# Supplementary material for: Multi-factor controls on terrestrial carbon dynamics in urbanized areas
Source: Copernicus journal article supplement (doi:10.5194/bg-11-7107-2014), 2014-12-16
Supplement: Supplementary file 1 [file bg-11-7107-2014-supplement.pdf]

Supplement of Biogeosciences, 11, 7107–7124, 2014  
<http://www.biogeosciences.net/11/7107/2014/>  
doi:10.5194/bg-11-7107-2014-supplement  
© Author(s) 2014. CC Attribution 3.0 License.

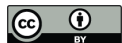

*Supplement of*

## **Multi-factor controls on terrestrial carbon dynamics in urbanized areas**

**C. Zhang et al.**

*Correspondence to:* H. Tian ([tianhan@auburn.edu](mailto:tianhan@auburn.edu)) and C. Zhang ([zc@ms.xjb.ac.cn](mailto:zc@ms.xjb.ac.cn))

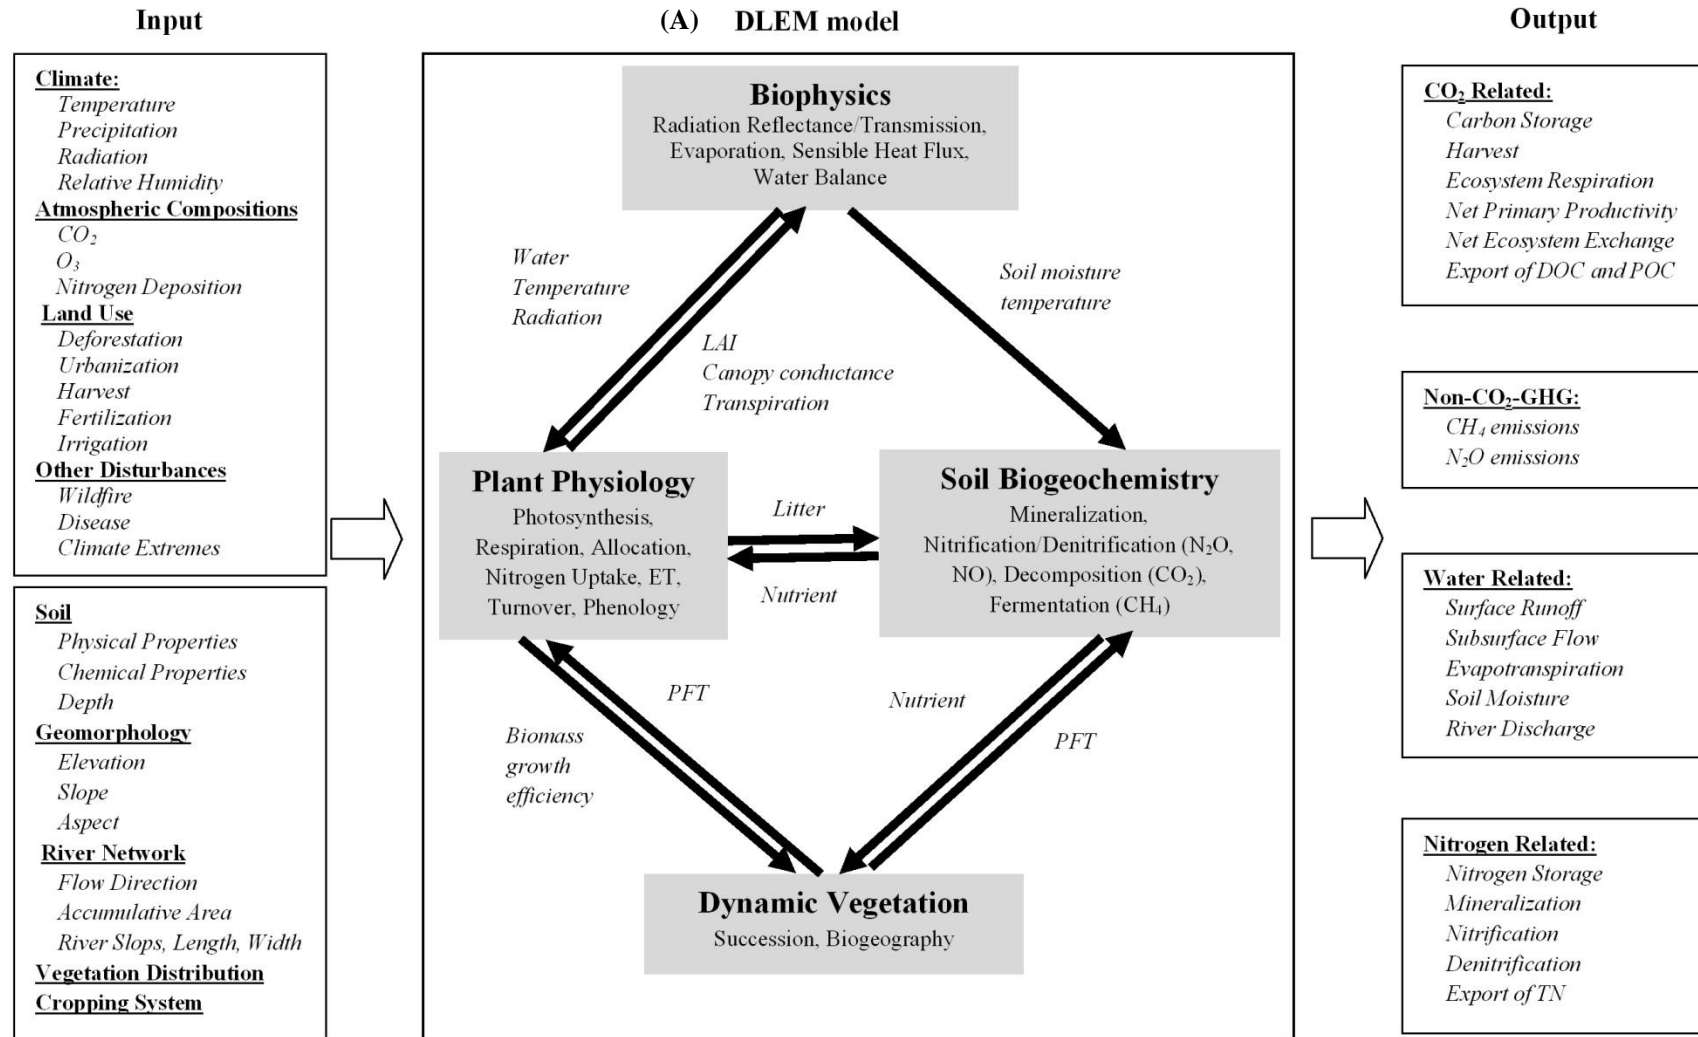

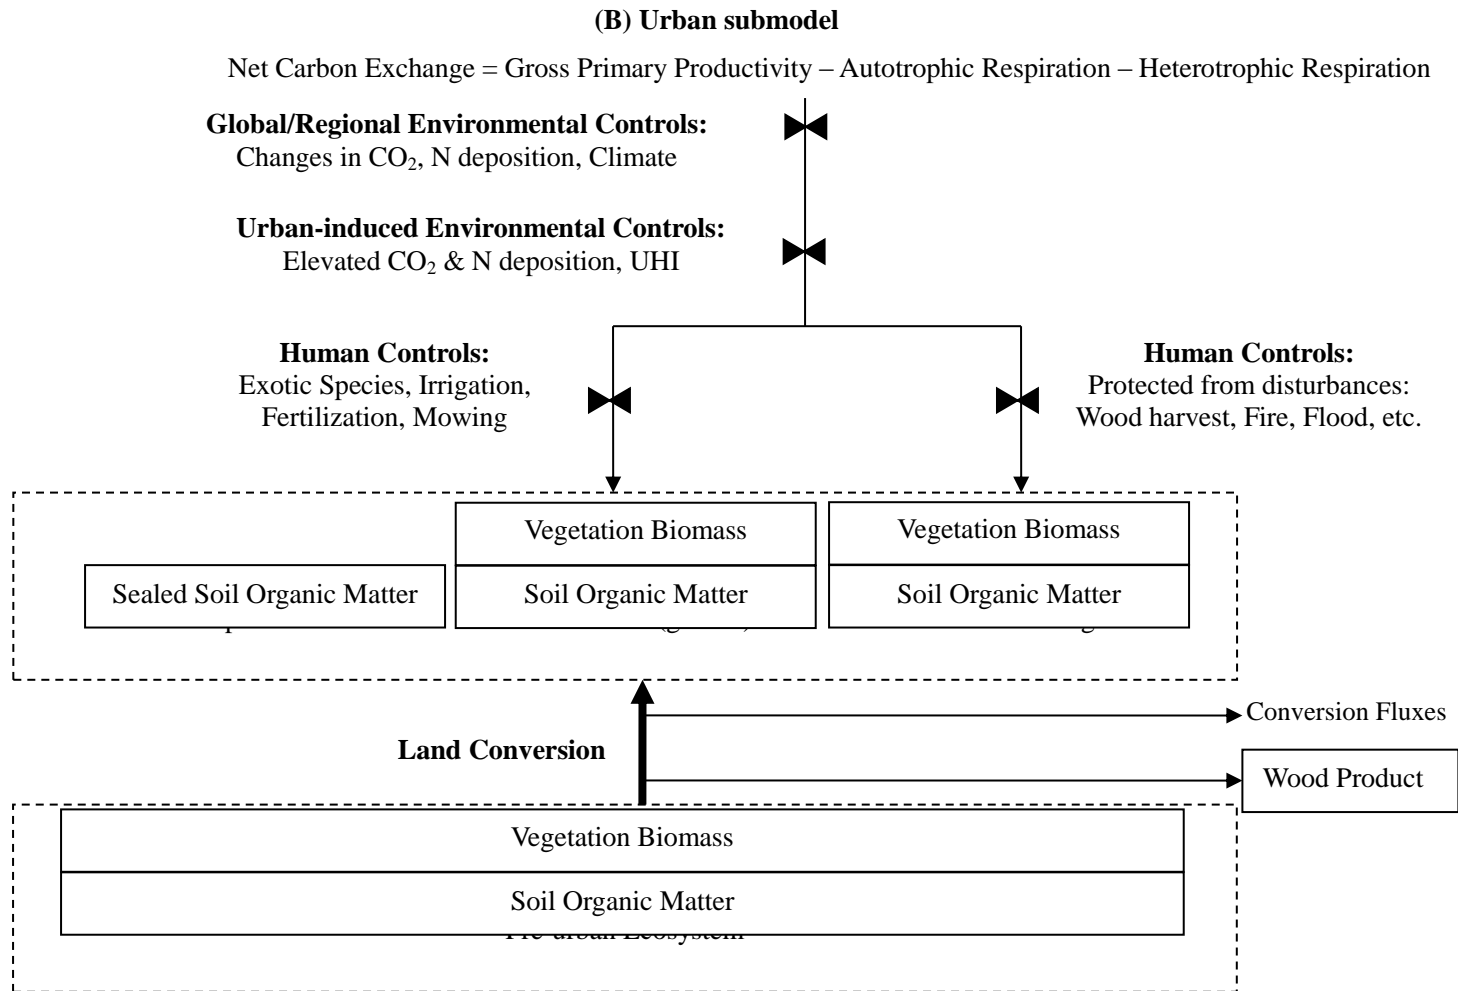

1  
2  
3  
4

Figure S1, Illustration of the Dynamic Land Ecosystem Model (DLEM). (a) the overall structure of DLEM; (b) the structure and controls of urban submodel in DLEM (Zhang et al., 2012).

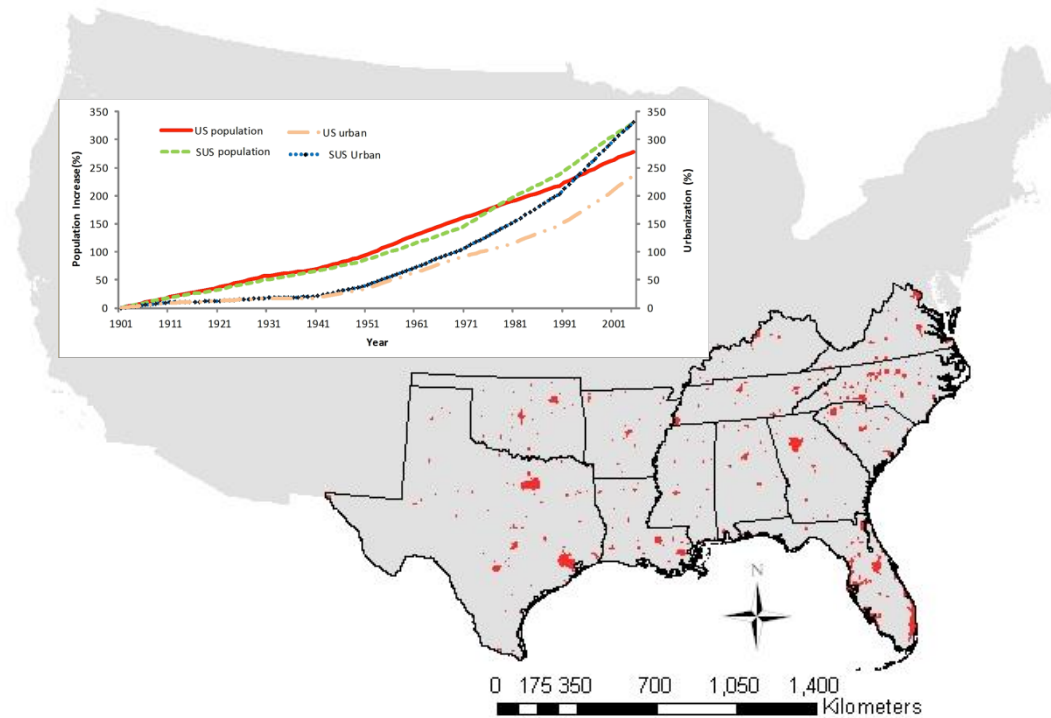

1  
 2 Figure S2, The boundary of the SUS and the location of urban/developed lands (in red) (Zhang et al., 2012). The urban and developed  
 3 lands were derived based on the study of Homer et al. (2007).  
 4

Table S1, Model inputs for the Southern US case study — the background environmental drivers

| Inputs                                    | Unit                      | Temporal Resolution | Methods and Data Sources                                                                                                                                                                                                                                                                                                                                                      |
|-------------------------------------------|---------------------------|---------------------|-------------------------------------------------------------------------------------------------------------------------------------------------------------------------------------------------------------------------------------------------------------------------------------------------------------------------------------------------------------------------------|
| Potential/native vegetation               | 8 <sup>#</sup> categories |                     | Aggregated from the NLCD 2001 land cover dataset (Homer et al., 2007).                                                                                                                                                                                                                                                                                                        |
| Soil clay content                         | %                         |                     |                                                                                                                                                                                                                                                                                                                                                                               |
| Soil sand content                         | %                         |                     |                                                                                                                                                                                                                                                                                                                                                                               |
| Soil silt content                         | %                         | Non-transient maps  | Based on the 1 km resolution digital general soil association map (STATSGO) developed by USDA Natural Resources Conservation (NRC) (Miller and White, 1998).                                                                                                                                                                                                                  |
| Soil acidity                              | pH                        |                     |                                                                                                                                                                                                                                                                                                                                                                               |
| Soil bulk density                         | g/cm <sup>3</sup>         |                     |                                                                                                                                                                                                                                                                                                                                                                               |
| Elevation map                             | m                         |                     | Generated from the 7.5 minute USGS National Elevation Dataset (NED). Data available online: <a href="http://edcnts12.cr.usgs.gov/ned/ned.html">edcnts12.cr.usgs.gov/ned/ned.html</a>                                                                                                                                                                                          |
| Aspect map                                | Degree                    |                     |                                                                                                                                                                                                                                                                                                                                                                               |
| Slope map                                 | Degree                    |                     |                                                                                                                                                                                                                                                                                                                                                                               |
| Irrigation map                            | 1/0                       |                     | From an Irrigated Area Map of the World developed by Thenkabail et al. (2006)                                                                                                                                                                                                                                                                                                 |
| Precipitation                             | mm                        |                     |                                                                                                                                                                                                                                                                                                                                                                               |
| Maximum, minimum, and average temperature | °C                        | Daily               | By integrating the daily climate pattern of the North American Regional Reanalysis (NARR; 32 km resolution) dataset (Mesinger et al., 2006) into the monthly PRISM (Parameter-elevation Regressions on Independent Slopes Model; 4 km resolution; 1895-present) climate data (Daly et al., 2008). See page 92-95 in Zhang (2008) for detailed description of the methodology. |
| Ozone index AOT40 <sup>@</sup>            | ppb-hr                    |                     | Dataset developed by Felzer et al. (2004)                                                                                                                                                                                                                                                                                                                                     |
| CO <sub>2</sub>                           | ppmv                      |                     | National Oceanic and Atmospheric Administration (NOAA) ( <a href="http://www.esrl.noaa.gov">www.esrl.noaa.gov</a> )                                                                                                                                                                                                                                                           |
| Nitrogen deposition <sup>§</sup>          | g N/m <sup>2</sup> /yr    |                     | Retrieved from a global data set that was extrapolated from a three-year dataset (Dentener, 2006).                                                                                                                                                                                                                                                                            |
| Cropland fertilization <sup>&amp;</sup>   | g N/ m <sup>2</sup> /yr   | Annual              | Based on the county-level fertilizer consumption records (Alexander and Smith, 1990; Ruddy et al., 2006)                                                                                                                                                                                                                                                                      |
| Cropland conversion                       | 0/1                       |                     | 1: urban or cropland; 0: natural vegetation types. Developed by combining the contemporary land-use map that was derived from NLCD2001 (Homer et al., 2007) with historical census dataset for cropland, urban, and population (Waisanen and Bliss, 2002)                                                                                                                     |
| Urbanization                              | 0/1                       |                     |                                                                                                                                                                                                                                                                                                                                                                               |

<sup>#</sup> The 8 potential plant functional types: deciduous broadleaf forest, coniferous broadleaf forest, mixture forest, shrubland, C3 grassland, C4 grassland, grass wetland, and forest wetland.

<sup>@</sup> AOT40 (ppb-hr) is the accumulated exposure over a threshold of 40 ppb during daylight hours. Before 1940 the ozone index was 0. After 1994 the ozone concentration was assumed to be stable.

<sup>§</sup> Nitrogen deposition includes NH<sub>x</sub> (NH<sub>3</sub> and NH<sub>4</sub><sup>+</sup>), and NO<sub>y</sub> (oxidized nitrogen except N<sub>2</sub>O).

& Available fertilization data extends from 1945 to 2002. We assumed no changes before 1945 and after
